# Supplementary material
Source: HighWire-hosted journal article supplement (https://bmjopen.bmj.com/content/9/7/e031132)
Supplement: inline-supplementary-material-2 [file inline-supplementary-material-2.pdf]

**Supplementary table 1.** Parameters from the group-based trajectory model

| Trajectory group                | Intercept (SE)   | Linear term (SE)  | Quadratic term (SE) | Cubic term (SE)   | Posterior class membership probability | Bayesian information criterion |
|---------------------------------|------------------|-------------------|---------------------|-------------------|----------------------------------------|--------------------------------|
| <b>Total</b>                    |                  |                   |                     |                   |                                        |                                |
| Stable                          | 5.218<br>(0.099) | -2.199<br>(0.136) | 0.774<br>(0.046)    | -0.070<br>(0.004) | 0.69                                   | -12426.78                      |
| Quick decrease                  | 5.384<br>(0.069) | -0.351<br>(0.100) | -0.146<br>(0.040)   | 0.023<br>(0.004)  | 0.95                                   |                                |
| Gradual decrease                | 5.500<br>(0.039) | -0.535<br>(0.048) | 0.218<br>(0.016)    | -0.028<br>(0.002) | 0.97                                   |                                |
| <b>MAIS (1&amp;2)</b>           |                  |                   |                     |                   |                                        |                                |
| Stable                          | 3.754<br>(0.060) | -0.079<br>(0.061) | -0.041<br>(0.012)   | -                 | 0.65                                   | -7538.03                       |
| Quick decrease                  | 5.631<br>(0.037) | -0.939<br>(0.032) | 0.122<br>(0.005)    | -                 | 0.97                                   |                                |
| Gradual decrease                | 4.867<br>(0.026) | 0.201<br>(0.018)  | -0.041<br>(0.003)   | -                 | 0.98                                   |                                |
| <b>MAIS <math>\geq 3</math></b> |                  |                   |                     |                   |                                        |                                |
| Stable                          | 3.703<br>(0.029) | 0.172<br>(0.012)  | -                   | -                 | 1.00                                   | -4834.55                       |
| Quick decrease                  | 5.073<br>(0.094) | 0.266<br>(0.139)  | -0.374<br>(0.055)   | 0.048<br>(0.006)  | 0.68                                   |                                |
| Gradual decrease                | 5.644<br>(0.056) | -0.680<br>(0.068) | 0.280<br>(0.023)    | -0.035<br>(0.002) | 0.97                                   |                                |
