# Supplementary material
Source: HighWire-hosted journal article supplement (https://bmjopen.bmj.com/content/9/7/e031132)
Supplement: inline-supplementary-material-4 [file inline-supplementary-material-4.pdf]

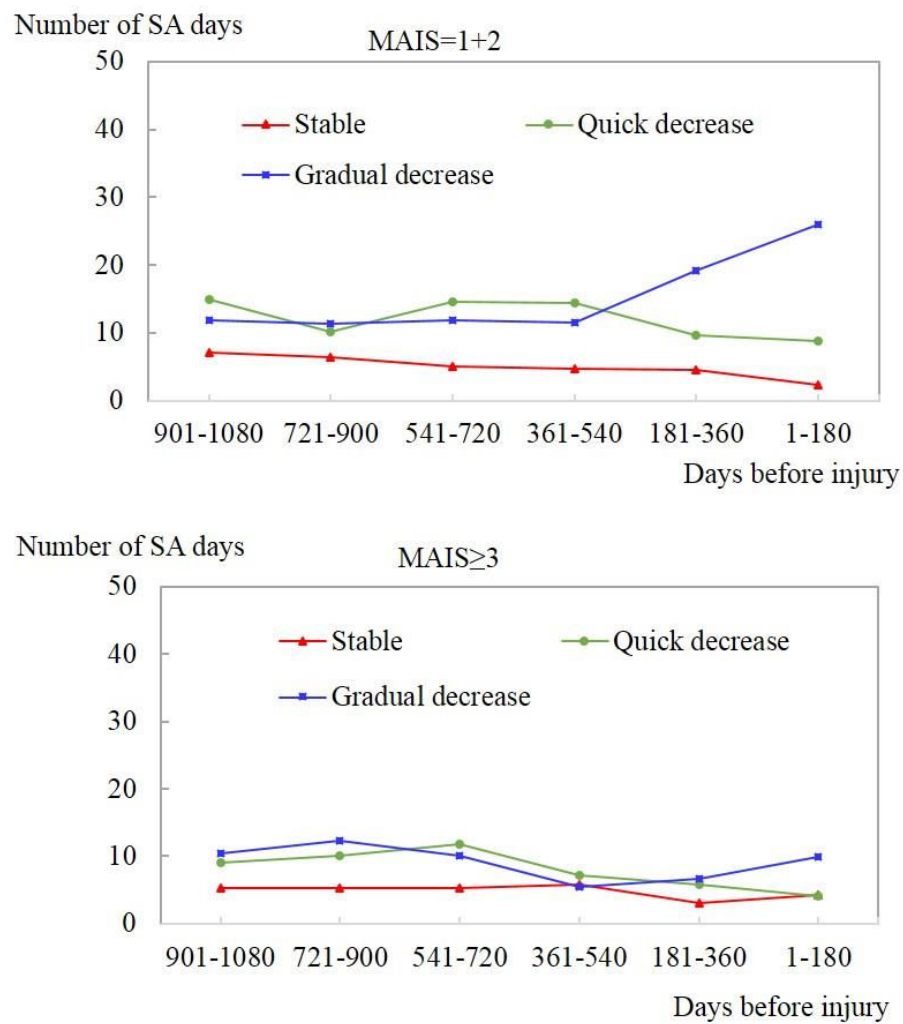**Supplementary figure 3.**
